# Supplementary material
Source: PubMed Central journal article supplement (PMC7678007)
Supplement: ciaa577_suppl_supplementary_table.pdf [file ciaa577_suppl_supplementary_table.pdf]

Supplementary Table I

| Symptoms                   | Patients (n=48) |
|----------------------------|-----------------|
| Male                       | 64,58%          |
| Age (median and IQR, year) | 62 (49-74,25)   |
| Dyspnea                    | 50,00%          |
| Fever                      | 84,78%          |
| Cough                      | 76,09%          |
| Sore throat                | 17,39%          |
| Diarrhea                   | 6,52%           |
| Nausea                     | 2,17%           |
| Vomiting                   | 6,52%           |
| Headache                   | 13,04%          |
| Asthenia                   | 32,61%          |
| Myalgia                    | 13,04%          |
| Severe respiratory failure | 63,04%          |
